1 **18S rDNA Sequence-Structure Phylogeny of the**  
2 **Trypanosomatida (Kinetoplastea, Euglenozoa) with**  
3 **Special Reference on *Trypanosoma***

4  
5 Alyssa R. Borges<sup>1,§</sup>, Markus Engstler<sup>1</sup> & Matthias Wolf<sup>2,§\*</sup>

6  
7 <sup>1</sup>*Department of Cell and Developmental Biology, Biocenter, University of Würzburg, Am*  
8 *Hubland, 97074 Würzburg, Germany*

9  
10 <sup>2</sup>*Department of Bioinformatics, Biocenter, University of Würzburg, Am Hubland, 97074*  
11 *Würzburg, Germany*

12  
13 <sup>§</sup> *These authors contributed equally to this work*

14 <sup>\*</sup> *Corresponding author: [matthias.wolf@biozentrum.uni-wuerzburg.de](mailto:matthias.wolf@biozentrum.uni-wuerzburg.de) (M. Wolf)*

15  
16 **Abstract**

17 **Background:** Parasites of the order Trypanosomatida are known due to their medical  
18 relevance. Trypanosomes cause African sleeping sickness and Chagas disease in South  
19 America, and *Leishmania* ROSS, 1903 species mutilate and kill hundreds of thousands of  
20 people each year. However, human pathogens are very few when compared to the great  
21 diversity of trypanosomatids. Despite the progresses made in the past decades on  
22 understanding the evolution of this group of organisms, there are still many open questions  
23 which require robust phylogenetic markers to increase the resolution of trees.

24 **Methods:** Using two known 18S rDNA template structures (from *Trypanosoma cruzi*  
25 CHAGAS, 1909 and *Trypanosoma brucei* PLIMMER & BRADFORD, 1899), individual 18S rDNA  
26 secondary structures were predicted by homology modeling. Sequences and their secondary  
27 structures, automatically encoded by a 12-letter alphabet (each nucleotide with its three  
28 structural states, paired left, paired right, unpaired), were simultaneously aligned. Sequence-  
29 structure trees were generated by neighbor joining and/or maximum likelihood.

30 **Results:** With a few exceptions, all nodes within a sequence-structure maximum likelihood  
31 tree of 43 representative 18S rDNA sequence-structure pairs are robustly supported (bootstrap  
32 support >75). Even a quick and easy sequence-structure neighbor-joining analysis yields  
33 accurate results and enables reconstruction and discussion of the big picture for all 240 18S  
34 rDNA sequence-structure pairs of trypanosomatids that are currently available.

35 **Conclusions:** We reconstructed the phylogeny of a comprehensive sampling of trypanosomes  
36 evaluated in the context of trypanosomatid diversity, demonstrating that the simultaneous use  
37 of 18S rDNA sequence and secondary structure data can reconstruct robust phylogenetic  
38 trees.

39

40 **Keywords:** Evolution, SSU, Phylogeny, RNA, Secondary Structure, Sequence-Structure,  
41 *Trypanosoma*.

42

## 43 **Background**

44 Kinetoplastids (Kinetoplastea HONIGBERG, 1963) are a remarkable group of unicellular  
45 organisms. They include free-living and parasite protists of invertebrates, vertebrates, and  
46 plants [1–3]. Among them, we find the obligatory parasites of the order Trypanosomatida  
47 KENT, 1880, emend VICKERMAN in Moreira et al. 2004 [3], including the human pathogens *T.*  
48 *brucei*, which causes African sleeping sickness, *T. cruzi*, the causative agent of Chagas  
49 disease in South America, and *Leishmania* species which infect and harm hundreds of

50 thousands of people each year [2,4,5]. African trypanosomes are likely the most well-known  
51 trypanosomatids. Due to their dixenic life cycle and the extracellular lifestyle in the vertebrate  
52 blood, they have evolved interesting, and sometimes unusual, mechanisms to deal with such  
53 different environments and challenges imposed by the immune system. Thus, it does not come  
54 as a surprise that major discoveries in cell biology have been made in trypanosomes, such as  
55 antigenic variation [6], glycolysis compartmented in unique organelles [7], GPI-anchoring of  
56 membrane proteins [8], and unprecedented nucleotide modifications [9].

57 For harboring such a diverse group of organisms, it is unsurprising that the evolution of  
58 parasitism inside Kinetoplastea has been intriguing scientists for decades. Given that each  
59 parasitic group has closely affiliated free-living relatives and reversion to a free-living state  
60 did not occur, it is probable that at least four independent adoptions of obligate parasitism or  
61 commensalism have occurred [2,5]. Currently, the earliest diverging lineage inside  
62 Trypanosomatida is the genus *Paratrypanosoma* VOTYPKA & LUKES, 2013, represented by  
63 one species found in mosquitoes, *Paratrypanosoma confusum* VOTYPKA & LUKES, 2013  
64 [10,11]. The vast majority of trypanosomatids are monoxenic parasites of insects with few  
65 dixenic genera due to the capacity of infect vertebrates, such as *Leishmania* and *Trypanosoma*  
66 GRUBY, 1843 [2]. Thus, the most likely origin of *Leishmania* and *Trypanosoma* is from within  
67 monoxenic trypanosomatids, implicating that their origins were no earlier than 370 million  
68 years ago, when the invasion of land by vertebrates occurred [5,12,13]. The transmission of  
69 an insect-living trypanosomatid into a warm-blooded host has most likely occurred many  
70 times with rare successful cases [5,10,13]. So far, only *Trypanosoma* and *Leishmania* have  
71 left surviving descendants and only trypanosomes have adopted an extracellular lifestyle in  
72 vertebrates.

73 Once having passed the vertebrate colonization bottleneck, *Trypanosoma* radiation and  
74 adaptation to diverse vertebrate species became an unprecedented evolutionary success story.  
75 Today, these parasites prosper in essentially all vertebrate Classes, from fish to birds [13–15].

76 The 18S rDNA marker has been extensively used to analyze the phylogenetic relationship  
77 inside this group [5,12,16–19]. The incorporation of glycosomal glyceraldehyde phosphate  
78 dehydrogenase (gGAPDH) to the analysis allowed the generation of more resolved trees,  
79 consolidating, for example, the long-lasting question about the monophyly inside  
80 *Trypanosoma* [13,15,17–21].

81 The advent of modern sequencing technologies has greatly advanced our understanding of  
82 trypanosomatid phylogeny, with more new genera described in the last decade than within the  
83 past century [2,3,5]. These days, trypanosomatid phylogeny has sufficiently advanced to  
84 provide a solid framework for comparative studies, with genomic data available for more than  
85 just the medically relevant kinetoplastids. Interestingly, the basic layout of trypanosomatid  
86 genomes appears to be strikingly similar, with high overall synteny, within and between  
87 monoxenic and dixenic species [2]. The constantly growing genome data might become a  
88 powerful tool for evolutionary inference. In the future, trypanosomatids will be studied not  
89 only as infective agents of devastating neglected tropical diseases, or powerful genetic and  
90 cellular model systems, but also to unravel basic principles of the evolution of unicellular  
91 eukaryotes. What we know today is just the tip of an iceberg. The origin of *Trypanosoma*, for  
92 example, remains enigmatic. Further, the presence of prokaryotic endosymbionts and viruses  
93 in trypanosomatids, or the full biodiversity and ecological role of insect trypanosomatids  
94 remain superficially explored [2,22].

95 Here, we present the first large scale study in which trypanosomatid RNA secondary structure  
96 is used as an additional source of phylogenetic information. We use 18S rRNA sequence-  
97 structure data simultaneously in inferring alignments and trees. This approach was recently  
98 reviewed and shown to increase robustness and accuracy of reconstructed phylogenies  
99 [23,24]. So far, all conclusions have been made with multigene trees. The most important  
100 result of our study is that there are only a few places in our robustly supported trees where  
101 branching does not match with multigene phylogenomic trees. It is these discrepancies with

102 which we focus our discussion, as they are potentially critical branches that are ambiguous  
103 and require more attention.

104

## 105 **Methods**

### 106 **Taxon Sampling, Secondary Structure Prediction, Sequence–Structure Alignment, and** 107 **Phylogenetic Tree Reconstruction**

108 We have used all 240 SSU 18S ribosomal RNA gene sequences from Trypanosomatida  
109 available at NCBI (GenBank) with a sequence length >1500 nucleotides and with a full  
110 taxonomic lineage down to a complete species name. Secondary structures of the 18S rDNA  
111 sequences were obtained by homology modeling [25] using the ITS2 database [26] as well as  
112 *T. cruzi* (AF245382) and *T. brucei* (M12676) as templates (Fig S1). The two template-  
113 secondary structures (without pseudoknots) were obtained from the Comparative RNA Web  
114 (CRW) site [27]. For sequence-structure alignments, the four nucleotides multiplied by three  
115 states (unpaired, paired left and paired right) are encoded by a 12-letter alphabet [24]. Using a  
116 specific 12×12 sequence-structure scoring matrix [28], global multiple sequence-structure  
117 alignments were automatically generated in ClustalW2 1.83 [29] as implemented in 4SALE  
118 1.7.1 [28,30]. Based on Keller et al. [23], using 12-letter encoded sequences, sequence-  
119 structure neighbor-joining (NJ) trees were determined using ProfDistS [31]. Further, using 12-  
120 letter encoded sequences, a sequence-structure maximum likelihood (ML) tree [32] - for only  
121 a representative subset of 43 sequence-structure pairs - was calculated using phangorn [33] as  
122 implemented in the statistical framework R [34]. The R script is available from the 4SALE  
123 homepage at <http://4sale.bioapps.biozentrum.uni-wuerzburg.de> [24]. Bootstrap support for all  
124 sequence-structure trees was estimated based on 100 pseudo-replicates. Trees were rooted  
125 with non-*Trypanosoma* sequences from Trypanosomatida.

126

## 127 **Results and discussion**

128 From the analysis of 240 18S rDNA sequence-structure pairs (Fig. 1) and selection of 43  
129 different species (Fig. 2), we obtained trees supported by high bootstraps values (> 75) on  
130 sister groups displaying the following *Trypanosoma* clades: the *Trypanosoma pestanai*  
131 BETTENCOURT & FRANCA, 1905 clade, represented in our tree by this species found in the  
132 Eurasian badger [13]; the *T. brucei* clade, consisting of trypanosome species naturally  
133 transmitted by tsetse flies, such as *Trypanosoma vivax* ZIEMANN, 1905, *Trypanosoma*  
134 *congolense* BRODEN, 1904, *Trypanosoma godfrey* MCNAMARA ET AL., 1994, *Trypanosoma*  
135 *simiae* BRUCE ET AL., 1913, *Trypanosoma equiperdum* DOFLEIN, 1901, *Trypanosoma evansi*  
136 STEEL, 1885, and *T. brucei* [13,17,19,21]; the *T. cruzi* clade, comprising mammalian  
137 trypanosomes with worldwide distribution, such as *T. cruzi*, *Trypanosoma rangeli* TEJERA,  
138 1920, and *Trypanosoma wauwau* TEIXEIRA & CAMARGO, 2016, endemic of Latin America,  
139 *Trypanosoma conorhini* (DONOVAN, 1909) SHORTT & SWAMINATH, 1928 found in Europe,  
140 South America and Africa, and *Trypanosoma dionisii* BETTENCOURT & FRANCA, 1905  
141 distributed in Latin America, Africa, Asia and Europe [19–21,35]; the *Trypanosoma lewisi*  
142 (KENT, 1880) LAVERAN & MESNIL, 1901 clade, including the rodent parasites *Trypanosoma*  
143 *microti* LAVERAN & PETTIT, 1910, *Trypanosoma grosi* LAVERAN & PETTIT, 1909 and *T. lewisi*  
144 [36]; the Crocodylian clade, harboring *Trypanosoma grayi* NOVY, 1906 from Africa and  
145 *Trypanosoma ralphi* TEIXEIRA & CAMARGO, 2013 from South America [15,37]; the Avian  
146 clade, with *Trypanosoma corvi* STEPHENS & CHRISTOPHERS, 1908, *Trypanosoma avium*  
147 DANILEWSKY, 1885 and *Trypanosoma thomasbancrofti* SLAPETA, 2016 [38]; the *Trypanosoma*  
148 *theileri* LAVERAN, 1902 clade, with *T. theileri*, a worldwide distributed cattle parasite, and  
149 the subclade representant *Trypanosoma cyclops* WEINMAN, 1972 [13,21]; and the Aquatic  
150 clade, harboring trypanosomes from fish, anurans and platypus [14,39,40]. Interestingly, the  
151 lizard/snake clade is also represented in our tree with *Trypanosoma varani* WENYON, 1908, a  
152 snake trypanosome, branching together with the mammal parasite *Trypanosoma freitasi* REGO

153 ET AL., 1957. The branching of marsupial and rodent trypanosomes inside this clade has been  
154 previously observed [36,41]. Thus, our analysis corroborates the existence of the lizard-  
155 snake/marsupial-rodent clade composed by trypanosomes transmitted by sandflies [36].  
156 The phylogenetic analyses using sequence-structure data of 18S rDNA (Fig. 2) supports the  
157 monophyly of *Trypanosoma* as previously observed in trees constructed with partial/  
158 complete sequences of 18S rDNA and/or gGAPDH sequences [15,17–19]. Intriguingly, in the  
159 tree obtained using a greater number of sequences (Fig. 1) *Strigomonas culicis* (WALLACE &  
160 JOHNSON, 1961) TEIXEIRA & CAMARGO, 2011 (U05679-1 and HQ659564-1) appear as a basal  
161 group of African trypanosomes (Fig. 1). To date, studies on Trypanosomatida showed a basal  
162 position of *Trypanosoma* in relation to *Strigomonas* LWOFF & LWOFF, 1931 [2,22,42]. Of  
163 notice, *S. culicis* is a monoxenic parasite of the order Diptera [22], the same order of the well-  
164 known vector of *T. brucei* clade trypanosomes, the tsetse fly. Although it may be tempting to  
165 speculate the derivation of the tsetse lifestyle of African trypanosomes from *Strigomonas*, we  
166 cannot exclude the possibility of poor sequence assembly, which could interfere with the  
167 topology observed. Finally, one sequence of the bat parasite *T. dionisii* clustered within the *T.*  
168 *brucei* clade (Fig. 1). This species is distributed worldwide, with its origin in Africa, and  
169 presents a high phyletic diversity [35]. However, its branching inside *T. cruzi* clade is strongly  
170 supported [13,17–19,21].  
171 The first branching of *Trypanosoma* (Fig. 2) forms two major groups: one lineage composed  
172 by *T. brucei* and *T. pestanai* clades, and another with trypanosomes from Terrestrial (*T. cruzi*,  
173 *T. lewisi*, *T. theileri*, snake-lizard/marsupial-rodent, avian and crocodylian clades) and Aquatic  
174 lineages. Thus, our tree corroborates the hypothesis of the independent evolutionary history of  
175 both human pathogens, *T. brucei* and *T. cruzi* [13]. The topology of our tree shows the  
176 Aquatic clade as a solid lineage, in accordance with previous observations [15,18,19,21].  
177 However, the origin of this clade is still under debate. Many studies using different DNA  
178 markers, such as long (> 1.4 kb) 18S rDNA sequences, v7v8 hypervariable region of 18S

179 rDNA and/or partial sequences of gGAPDH, showed either an early division between Aquatic  
180 and Terrestrial lineages as a single event [15,18,19,21] or in subsequent events with  
181 amphibian trypanosomes and *Trypanosoma thezieni* BRYGOO, 1963 at the basis of  
182 *Trypanosoma* [17,43,44]. Interestingly, our tree suggests a later evolution of the Aquatic clade  
183 from Terrestrial trypanosomes (Fig. 2), which agrees with the insect-first hypothesis [13,36].  
184 This hypothesis assumes that trypanosomes were originated from a monogenetic insect  
185 parasite that adapted to live inside terrestrial vertebrates and later spread to leeches and other  
186 aquatic animals, most likely through amphibians [13].  
187 Trypanosomes of the *T. brucei* clade are virtually restricted to Africa, having an exception in  
188 *T. vivax* [45,46]. The early divergence of *T. vivax* inside the *T. brucei* clade (Fig. 1, 2) is in  
189 accordance to previous results showing a higher evolutionary rate of this species among the  
190 Salivarian trypanosomes [19,21,47]. It is interesting to consider that a previous analysis of  
191 18S rDNA sequences revealed that members of the *T. brucei* clade show an evolutionary rate  
192 higher than other trypanosomes [47]. However, this high divergence has proven not to alter  
193 the topology of sequence-based trees [17]. Inside this clade, a low bootstrap value (ML = 53)  
194 is observed in the differentiation between *T. brucei* and *T. evansi* (Fig. 2), suggesting an  
195 unresolved positioning. In fact, the relationship between these species is controversial, with  
196 results supporting either *T. evansi* as a subspecies of *T. brucei* or showing great diversity  
197 between both depending on the *T. evansi* strains [48,49].  
198 Regarding the other major group of our analysis (Terrestrial/Aquatic lineages), the first  
199 branching inside this group suggests the differentiation of the snake-lizard/marsupial-rodent  
200 clade as a basal group of other trypanosomes (Fig. 2). However, other studies have suggested  
201 avian trypanosomes as a basal group among terrestrial lineages [13,17]. This can be  
202 associated with the low bootstrap values of our tree in either three events: the snake-  
203 lizard/marsupial-rodent clade (ML = 54) differentiation, the divergence of crocodilian



204 trypanosomes (ML = 55), and the internal branch of avian trypanosomes (ML = 61), which  
205 will be further explored in our discussion.

206 The *T. cruzi* and *T. lewisi* clades appear as sister groups in our analysis (Fig. 2), as has been  
207 previously demonstrated [17–19,21]. The *T. cruzi* clade can be subdivided into three  
208 subclades: Schyzotrypanum, *T. wauwau* (and other Neotropical bat trypanosomes,  
209 *Trypanosoma noyesi* BOTERO & COOPER, 2016, and *Trypanosoma livingstonei* TEIXEIRA &  
210 CAMARGO, 2013) and *T. rangeli*/*T. conorhini* [21,35]. The specific sequences of  
211 *Trypanosoma minasense* CHAGAS, 1908 and *Trypanosoma leeuwenhoekii* SHAW, 1969  
212 grouped with *T. rangeli* in our tree were previously considered synonyms of this species by  
213 18S rDNA sequence analysis, explaining their positioning [13,50]. Regarding the *T. lewisi*  
214 clade, our results suggest the existence of two subclades inside the group (ML = 100), one  
215 harboring *T. microti*, and the other with *T. lewisi* and *T. grosi*. This finding is in accordance  
216 with a recent analysis of long fragments of 18S rDNA which demonstrated this subdivision  
217 despite the similarities in the v7v8 hypervariable region [51].

218 Concerning avian trypanosomes, our tree reflects previous findings in both the divergence  
219 between *T. avium* and *T. corvi* and the highly supported (ML = 100) proximity between *T.*  
220 *avium* and *T. thomasbancrofti* [38,50]. A low bootstrap value (ML = 61) is observed in the  
221 divergence of *T. corvi* and *T. avium*/*T. thomasbancrofti*. It is interesting to note that we  
222 currently have two topologies known in literature, with the possibility of paraphyly  
223 demonstrated by analysis of long sequences of 18S rDNA [19,38]. This, however, was not  
224 observed in trees constructed with v7v8 hypervariable region of 18S rDNA, gGAPDH  
225 sequences, or concatenated trees using both [15,37,52]. Thus, our tree indicates the need for a  
226 better resolution on avian trypanosome positioning. Considering that we used only three  
227 species of avian and two species of crocodylian trypanosomes in our reconstruction, our  
228 approach represents an interesting method to be applied in further studies.

229 In our analysis we see the crocodilian/alligator trypanosomes (*T. grayi* and *T. ralphi*)  
230 branching together with a high support value (ML = 100) (Fig. 2). Although *T. grayi* is found  
231 in Africa and *T. ralphi* in South America [15,37,52], in a tree with distant external groups like  
232 ours, this topology is expected due to their proximity inside the Crocodilian clade [15,37].  
233 Our tree reflects the proximity of the crocodilian trypanosomes with *T. cruzi* clade, as  
234 previously observed through full genome analysis [53]. Interestingly, crocodilian  
235 trypanosomes, such as *T. grayi* and *Trypanosoma kaiowa* TEIXEIRA & CAMARGO, 2019 are  
236 tsetse-transmitted species that are not restricted to the sub-Saharan belt [15,37,53], suggesting  
237 higher adaptive plasticity of crocodilian trypanosomes.

238 The trypanosomes of the Aquatic lineage branched together (Fig. 2). The subgroups observed  
239 are anuran trypanosomes (*Trypanosoma rotatorium* (MAYER, 1843) LAVERAN, 1901,  
240 *Trypanosoma mega* DUTTON & TODD, 1903, *Trypanosoma fallisi* MARTIN & DESSER, 1990,  
241 *Trypanosoma ranarum* (LANKESTER, 1871) DANILEWSKY, 1885, and *Trypanosoma*  
242 *neveulemairei* BRUMPT, 1928) and fish trypanosomes (*Trypanosoma siniperca* CHANG, 1964,  
243 *Trypanosoma ophiocephali* CHEN, 1964, *Trypanosoma cobitis* MITROPHANOW, 1884,  
244 *Trypanosoma granulorum* LAVERAN & MESNIL, 1902, *Trypanosoma pleuronectidium*  
245 ROBERTSON, 1906) along with the platypus parasite *Trypanosoma binneyi* MACKERRAS, 1959,  
246 which is in accordance to the literature [14,15,39,40]. Interestingly, the anuran parasite,  
247 *Trypanosoma chattoni* MATHIS & LAGER, 1911, appears in our analysis more related to fish  
248 and platypus trypanosomes than to the anuran clade. This positioning of *T. chattoni* was  
249 shown in a previous study using complete 18S rDNA sequences and non-trypanosomes as the  
250 outgroup [54]. However, recent trees using complete 18S rDNA sequences and concatenated  
251 analysis of v7v8 hypervariable region and gGAPDH rooted by other trypanosomes sustained  
252 a monophyletic anuran clade [39,40]. Thus, *T. chattoni* positioning in our tree can be related  
253 to the use of non-trypanosomes as the outgroup.

254

255

## 256 **Conclusions**

257 18S rDNA is one of the most used markers in inferring phylogenies at higher taxonomic  
258 levels. However, this molecule has often been claimed to be inadequate for reconstructing  
259 phylogenetic relationships at lower taxonomic levels, in particular, because of its conservative  
260 rate of evolution. Thus, the use of the v7v8 hypervariable region has become popular inside  
261 the trypanosome community as a barcode suitable to describe new species along with  
262 gGAPDH [13]. However, some questions regarding the positioning of the groups still need to  
263 be answered. To this, evaluating bigger sequences and using different genetic markers can  
264 bring more information to the analysis improving resolution of the trees [13]. In this work, we  
265 demonstrate that the simultaneous use of 18S rDNA sequence and secondary structure data  
266 (i.e., the consideration of the individual secondary structures of the rRNA genes) could indeed  
267 provide important information for reconstructing more robust phylogenetic trees. Our  
268 topology highlights the need for further exploration of some groups, such as the avian and  
269 snake-lizard/marsupial-rodent clades, which are less explored in trypanosome phylogenies.  
270 Therefore, this study provides an additional fundament for upcoming phylogenetic  
271 reconstructions and/or barcoding approaches which can be used not only in trypanosomatids.

272

## 273 **Declarations**

### 274 **Ethics approval and consent to participate**

275 Not applicable

276

### 277 **Consent for publication**

278 Not applicable

279

280 **Availability of data and materials**

281 The sequence data analysed in this paper is publicly available in NCBI (GenBank) and their  
282 respective accession numbers are included in the trees. Data supporting the conclusions of this  
283 article are included within the article. Data and materials are available upon reasonable  
284 request to the corresponding author.

285

286 **Competing interests**

287 The authors declare that they have no competing interests.

288

289 **Funding**

290 Ph.D. scholarship was granted to Alyssa Rossi Borges by Brazilian agency CAPES (program:  
291 CAPES/DAAD - Call No. 22/2018; process 88881.199683/2018-01). ME is supported by  
292 DFGgrants EN-305.

293

294 **Authors' contributions**

295 MW conceived the study and performed the bioinformatic analysis. ARB analyzed the data  
296 and majorly contributed to the manuscript writing. ME and MW assisted with data analysis  
297 and manuscript writing. All authors read and approved the final manuscript.

298

299 **Acknowledgments**

300 We thank Julius Lukeš (Institute of Parasitology, Biology Centre CAS, Czech Republic) for  
301 fruitful discussions and a pre-review of our manuscript, Jaime Lisack for proof-reading, and  
302 Elisabeth Meyer-Natus for obtaining the electron microscopy image used in the graphical  
303 abstract.

304

305 **References**

- 306 1. Cavalier-Smith T. Higher classification and phylogeny of Euglenozoa. *Eur J Protistol.*  
307 2016;56:250–76.
- 308 2. Lukeš J, Butenko A, Hashimi H, Maslov DA, Votýpka J, Yurchenko V. Trypanosomatids  
309 are much more than just trypanosomes: clues from the expanded family tree. *Trends Parasitol.*  
310 2018;34:466–80.
- 311 3. Adl SM, Bass D, Lane CE, Lukeš J, Schoch CL, Smirnov A, et al. Revisions to the  
312 classification, nomenclature, and diversity of eukaryotes. *J Euk Microbiol.* 2019;66:4–119.
- 313 4. WHO. Research priorities for Chagas disease, human African trypanosomiasis and  
314 leishmaniasis. WHO; 2012.  
315 [http://www.who.int/trypanosomiasis\\_african/resources/who\\_trs\\_975/en/](http://www.who.int/trypanosomiasis_african/resources/who_trs_975/en/)
- 316 5. Lukeš J, Skalický T, Týč J, Votýpka J, Yurchenko V. Evolution of parasitism in  
317 kinetoplastid flagellates. *Mol Biochem Parasitol.* 2014;195:115–22.
- 318 6. Vickerman K. Antigenic variation in trypanosomes. *Nature.* 1978;273:613–7.
- 319 7. Hart DT, Baudhuin P, Opperdoes FR, de Duve C. Biogenesis of the glycosome in  
320 *Trypanosoma brucei*: the synthesis, translocation and turnover of glycosomal polypeptides.  
321 *EMBO J.* 1987;6:1403–11.
- 322 8. Menon AK, Mayor S, Ferguson MA, Duszenko M, Cross GA. Candidate  
323 glycerophospholipid precursor for the glycosylphosphatidylinositol membrane anchor of  
324 *Trypanosoma brucei* variant surface glycoproteins. *J Biol Chem.* 1988;263:1970–7.
- 325 9. Gommers-Ampt JH, Van Leeuwen F, de Beer AL, Vliegthart JF, Dizdaroglu M,  
326 Kowalak JA, et al. beta-D-glucosyl-hydroxymethyluracil: a novel modified base present in the  
327 DNA of the parasitic protozoan *T. brucei*. *Cell.* 1993;75:1129–36.
- 328 10. Flegontov P, Votýpka J, Skalický T, Logacheva MD, Penin AA, Tanifuji G, et al.  
329 *Paratrypanosoma* is a novel early-branching trypanosomatid. *Curr Biol.* 2013;23:1787–93.
- 330 11. Skalický T, Dobáková E, Wheeler RJ, Tesařová M, Flegontov P, Jirsová D, et al.  
331 Extensive flagellar remodeling during the complex life cycle of *Paratrypanosoma*, an early-  
332 branching trypanosomatid. *Proc Natl Acad Sci USA.* 2017;114:11757–62.
- 333 12. Stevens JR, Gibson W, Stevens JR, Gibson W. The molecular evolution of trypanosomes.  
334 *Parasitol Today.* 1999;15:432–7.
- 335 13. Hamilton PB, Stevens JR. Classification and phylogeny of *Trypanosoma cruzi*. In:  
336 Telleria J, Tibayrenc M, editors. *American Trypanosomiasis Chagas Disease*. 2nd ed.  
337 London: Elsevier; 2017. p. 321–44.
- 338 14. Lemos M, Fermino BR, Simas-Rodrigues C, Hoffmann L, Silva R, Camargo EP, et al.  
339 Phylogenetic and morphological characterization of trypanosomes from Brazilian armoured  
340 catfishes and leeches reveal high species diversity, mixed infections and a new fish  
341 trypanosome species. *Parasit Vectors.* 2015;8:573.
- 342 15. Fermino BR, Paiva F, Viola LB, Rodrigues CMF, Garcia HA, Campaner M, et al. Shared  
343 species of crocodylian trypanosomes carried by tabanid flies in Africa and South America,

- 344 including the description of a new species from caimans, *Trypanosoma kaiowa* n. sp. Parasit  
345 Vectors. 2019;12:225.
- 346 16. Maslov DA, Podlipaev SA, Lukes J. Phylogeny of the kinetoplastida: taxonomic problems  
347 and insights into the evolution of parasitism. Mem Inst Oswaldo Cruz. 2001;96:397–402.
- 348 17. Hamilton PB, Stevens JR, Gaunt MW, Gidley J, Gibson WC. Trypanosomes are  
349 monophyletic: evidence from genes for glyceraldehyde phosphate dehydrogenase and small  
350 subunit ribosomal RNA. Int J Parasitol. 2004;34:1393–404.
- 351 18. Hamilton PB, Stevens JR, Gidley J, Holz P, Gibson WC. A new lineage of trypanosomes  
352 from Australian vertebrates and terrestrial bloodsucking leeches (Haemadipsidae). Int J  
353 Parasitol. 2005;35:431–43.
- 354 19. Hamilton PB, Gibson WC, Stevens JR. Patterns of co-evolution between trypanosomes  
355 and their hosts deduced from ribosomal RNA and protein-coding gene phylogenies. Mol  
356 Phylogenet Evol. 2007;44:15–25.
- 357 20. Hamilton PB, Adams ER, Njiokou F, Gibson WC, Cuny G, Herder S. Phylogenetic  
358 analysis reveals the presence of the *Trypanosoma cruzi* clade in African terrestrial mammals.  
359 Infect Genet Evol. 2009;9:81–6.
- 360 21. Lima L, Espinosa-Álvarez O, Pinto CM, Cavazzana M, Pavan AC, Carranza JC, et al.  
361 New insights into the evolution of the *Trypanosoma cruzi* clade provided by a new  
362 trypanosome species tightly linked to Neotropical *Pteronotus* bats and related to an Australian  
363 lineage of trypanosomes. Parasit Vectors. 2015;8:657.
- 364 22. Teixeira MMG, Borghesan TC, Ferreira RC, Santos MA, Takata CSA, Campaner M, et al.  
365 Phylogenetic validation of the genera *Angomonas* and *Strigomonas* of trypanosomatids  
366 harboring bacterial endosymbionts with the description of new species of trypanosomatids  
367 and of proteobacterial symbionts. Protist. 2011;162:503–24.
- 368 23. Keller A, Förster F, Müller T, Dandekar T, Schultz J, Wolf M. Including RNA secondary  
369 structures improves accuracy and robustness in reconstruction of phylogenetic trees. Biol  
370 Direct. 2010;5:4.
- 371 24. Wolf M, Koetschan C, Müller T. ITS2, 18S, 16S or any other RNA - simply aligning  
372 sequences and their individual secondary structures simultaneously by an automatic approach.  
373 Gene. 2014;546:145–9.
- 374 25. Hall BS, Smith E, Langer W, Jacobs LA, Goulding D, Field MC. Developmental variation  
375 in Rab11-dependent trafficking in *Trypanosoma brucei*. Eukaryot Cell. 2005;4:971–80.
- 376 26. Ankenbrand MJ, Keller A, Wolf M, Schultz J, Förster F. ITS2 Database V: Twice as  
377 Much. Mol Biol Evol. 2015;32:3030–2.
- 378 27. Cannone JJ, Subramanian S, Schnare MN, Collett JR, D’Souza LM, Du Y, et al. The  
379 Comparative RNA Web (CRW) Site: an online database of comparative sequence and  
380 structure information for ribosomal, intron, and other RNAs. BMC Bioinformatics. 2002;3:2.
- 381 28. Seibel PN, Müller T, Dandekar T, Schultz J, Wolf M. 4SALE – A tool for synchronous  
382 RNA sequence and secondary structure alignment and editing. BMC Bioinformatics.  
383 2006;7:498.

- 384 29. Larkin MA, Blackshields G, Brown NP, Chenna R, McGettigan PA, McWilliam H, et al.  
385 Clustal W and Clustal X version 2.0. *Bioinformatics*. 2007;23:2947–8.
- 386 30. Seibel PN, Müller T, Dandekar T, Wolf M. Synchronous visual analysis and editing of  
387 RNA sequence and secondary structure alignments using 4SALE. *BMC Res Notes*.  
388 2008;1:91.
- 389 31. Wolf M, Ruderisch B, Dandekar T, Schultz J, Müller T. ProfDistS: (profile-) distance  
390 based phylogeny on sequence--structure alignments. *Bioinformatics*. 2008;24:2401–2.
- 391 32. Felsenstein J. Evolutionary trees from gene frequencies and quantitative characters:  
392 finding maximum likelihood estimates. *Evolution*. 1981;35:1229–42.
- 393 33. Schliep KP. phangorn: phylogenetic analysis in R. *Bioinformatics*. 2011;27:592–3.
- 394 34. R Core Team. R: a language and environment for statistical computing. R Foundation for  
395 Statistical Computing, Vienna.; 2014.
- 396 35. Clément L, Dietrich M, Markotter W, Fasel NJ, Monadjem A, López-Baucells A, et al.  
397 Out of Africa: The origins of the protozoan blood parasites of the *Trypanosoma cruzi* clade  
398 found in bats from Africa. *Mol Phylogenet Evol*. 2020;145:106705.
- 399 36. Ortiz PA, Garcia HA, Lima L, da Silva FM, Campaner M, Pereira CL, et al. Diagnosis  
400 and genetic analysis of the worldwide distributed *Rattus*-borne *Trypanosoma (Herpetosoma)*  
401 *lewisi* and its allied species in blood and fleas of rodents. *Infect Genet Evol*. 2018;63:380–90.
- 402 37. Fermino BR, Viola LB, Paiva F, Garcia HA, de Paula CD, Botero-Arias R, et al. The  
403 phylogeography of trypanosomes from South American alligatorids and African crocodilids is  
404 consistent with the geological history of South American river basins and the transoceanic  
405 dispersal of *Crocodylus* at the Miocene. *Parasit Vectors*. 2013;6:313.
- 406 38. Šlapeta J, Morin-Adeline V, Thompson P, McDonell D, Shiels M, Gilchrist K, et al.  
407 Intercontinental distribution of a new trypanosome species from Australian endemic Regent  
408 Honeyeater (*Anthochaera phrygia*). *Parasitology*. 2016;143:1012–25.
- 409 39. Attias M, Sato LH, Ferreira RC, Takata CSA, Campaner M, Camargo EP, et al.  
410 Developmental and ultrastructural characterization and phylogenetic analysis of *Trypanosoma*  
411 *herthameyeri* n. sp. of Brazilian Leptodactylidae frogs. *J Euk Microbiol*. 2016;63:610–22.
- 412 40. Spodareva VV, Grybchuk-Ieremenko A, Losev A, Votýpka J, Lukeš J, Yurchenko V, et  
413 al. Diversity and evolution of anuran trypanosomes: insights from the study of European  
414 species. *Parasit Vectors*. 2018;11:447.
- 415 41. Dobigny G, Poirier P, Hima K, Cabaret O, Gauthier P, Tatard C, et al. Molecular survey  
416 of rodent-borne *Trypanosoma* in Niger with special emphasis on *T. lewisi* imported by  
417 invasive black rats. *Acta Trop*. 2011;117:183–8.
- 418 42. Du Y, Maslov DA, Chang K-P. Monophyletic origin of (division proteobacterial  
419 endosymbionts and their coevolution with insect trypanosomatid protozoa *Blastocrithidia*  
420 *culicis* and *Crithidia* spp. *Proc Natl Acad Sci USA*. 1994;91:8437–8441.
- 421 43. Botero A, Thompson CK, Peacock CS, Clode PL, Nicholls PK, Wayne AF, et al.  
422 Trypanosomes genetic diversity, polyparasitism and the population decline of the critically

- 423 endangered Australian marsupial, the brush tailed bettong or woylie (*Bettongia penicillata*).  
424 Int J Parasitol Parasites Wildl. 2013;2:77–89.
- 425 44. Botero A, Cooper C, Thompson CK, Clode PL, Rose K, Thompson RCA. Morphological  
426 and phylogenetic description of *Trypanosoma noyesi* sp. nov.: an Australian wildlife  
427 trypanosome within the *T. cruzi* clade. Protist. 2016;167:425–39.
- 428 45. Rodrigues AC, Neves L, Garcia HA, Viola LB, Marcili A, Da Silva FM, et al.  
429 Phylogenetic analysis of *Trypanosoma vivax* supports the separation of South American/West  
430 African from East African isolates and a new *T. vivax*-like genotype infecting a nyala antelope  
431 from Mozambique. Parasitology. 2008;135:1317–28.
- 432 46. Silva Pereira S, de Almeida Castilho Neto KJG, Duffy CW, Richards P, Noyes H, Ogugo  
433 M, et al. Variant antigen diversity in *Trypanosoma vivax* is not driven by recombination. Nat  
434 Commun. 2020;11:844.
- 435 47. Stevens J, Rambaut A. Evolutionary rate differences in trypanosomes. Infect Genet Evol.  
436 2001;1:143–50.
- 437 48. Carnes J, Anupama A, Balmer O, Jackson A, Lewis M, Brown R, et al. Genome and  
438 phylogenetic analyses of *Trypanosoma evansi* reveal extensive similarity to *T. brucei* and  
439 multiple independent origins for dyskinetoplasty. PLoS Negl Trop Dis. 2015;9.
- 440 49. Kamidi CM, Saarman NP, Dion K, Mireji PO, Ouma C, Murilla G, et al. Multiple  
441 evolutionary origins of *Trypanosoma evansi* in Kenya. PLoS Negl Trop Dis. 2017;11.
- 442 50. Sato H, Leo N, Katakai Y, Takano J, Akari H, Nakamura S, et al. Prevalence and  
443 molecular phylogenetic characterization of *Trypanosoma (Megatrypanum) minasense* in the  
444 peripheral blood of small neotropical primates after a quarantine period. J Parasitol.  
445 2008;94:1128–38.
- 446 51. Egan SL, Taylor CL, Austen JM, Banks PB, Ahlstrom LA, Ryan UM, et al. Molecular  
447 identification of the *Trypanosoma (Herpetosoma) lewisi* clade in black rats (*Rattus rattus*)  
448 from Australia. Parasitol Res. 2020;119:1691–6.
- 449 52. Fermino BR, Paiva F, Soares P, Tavares LER, Viola LB, Ferreira RC, et al. Field and  
450 experimental evidence of a new caiman trypanosome species closely phylogenetically related  
451 to fish trypanosomes and transmitted by leeches. Int J Parasitol Parasites Wildl. 2015;4:368–  
452 78.
- 453 53. Kelly S, Ivens A, Manna PT, Gibson W, Field MC. A draft genome for the African  
454 crocodylian trypanosome *Trypanosoma grayi*. Sci Data. 2014;1:140024.
- 455 54. Martin DS, Wright A-DG, Barta JR, Desser SS. Phylogenetic position of the giant anuran  
456 trypanosomes *Trypanosoma chattoni*, *Trypanosoma fallisi*, *Trypanosoma mega*, *Trypanosoma*  
457 *neveulemairei*, and *Trypanosoma ranarum* inferred from 18S rRNA gene sequences. J  
458 Parasitol. 2002;88:566–71.

459

460



461 **Figure legends:**

462

463 **Fig. 1: 18S rDNA sequence-structure neighbor-joining (NJ) tree** obtained by ProfDistS

464 [31]. All 240 18S rDNA sequences from Trypanosomatida (Kinetoplastea, Euglenozoa)

465 available at NCBI (GenBank) with a sequence length >1500 nucleotides and with a full

466 taxonomic lineage down to a complete species name have been used for the analysis. For tree

467 reconstruction the global multiple sequence-structure alignment (.xfasta format) as derived by

468 4SALE [28,30] was automatically encoded by a 12-letter alphabet [24]. GenBank accession

469 numbers accompany each taxon name. Key taxa are off and on marked in gray and

470 additionally named alongside the tree. Non-monophyletic taxa are indicated by quotation

471 marks. Singletons are highlighted red and polyphyletic taxa are highlighted blue. The scale

472 bar indicates evolutionary distances. The tree is rooted at non-*Trypanosoma* sequences.

473

474 **Fig. 2: 18S rDNA sequence-structure maximum likelihood (ML) tree**, representative

475 subset of 43 sequences from Fig. 1, obtained by phangorn as implemented in R [33].

476 Bootstrap values from 100 pseudo-replicates, mapped at the appropriate internodes, are from

477 maximum likelihood- (ML) and neighbor-joining- (NJ, obtained by ProfDistS, Wolf et al.

478 [31]) analyses. For NJ tree reconstruction the global multiple sequence-structure alignment

479 (.xfasta format) as derived by 4SALE [28,30] was automatically encoded by a 12-letter

480 alphabet [24]. For ML tree reconstruction the “one letter encoded” fasta format (12-letter

481 alphabet) as derived by 4SALE [28,30] was used. GenBank identifiers accompany each taxon

482 name. The scale bar indicates evolutionary distances. Highly supported branches are indicated

483 by thicker lines. The tree is rooted at *Crithridia mellifica* (KM980182) and *Leishmania*

484 *amazonensis* (JX030087). Clades discussed in the text are highlighted.

485

486 **Supplementary Material**

487

488 **Fig. S1:** *Trypanosoma brucei* (M12676). Secondary structure: small subunit ribosomal RNA

489 taken from the Comparative RNA Web (CRW) site [27].

490

NJ  
0.02

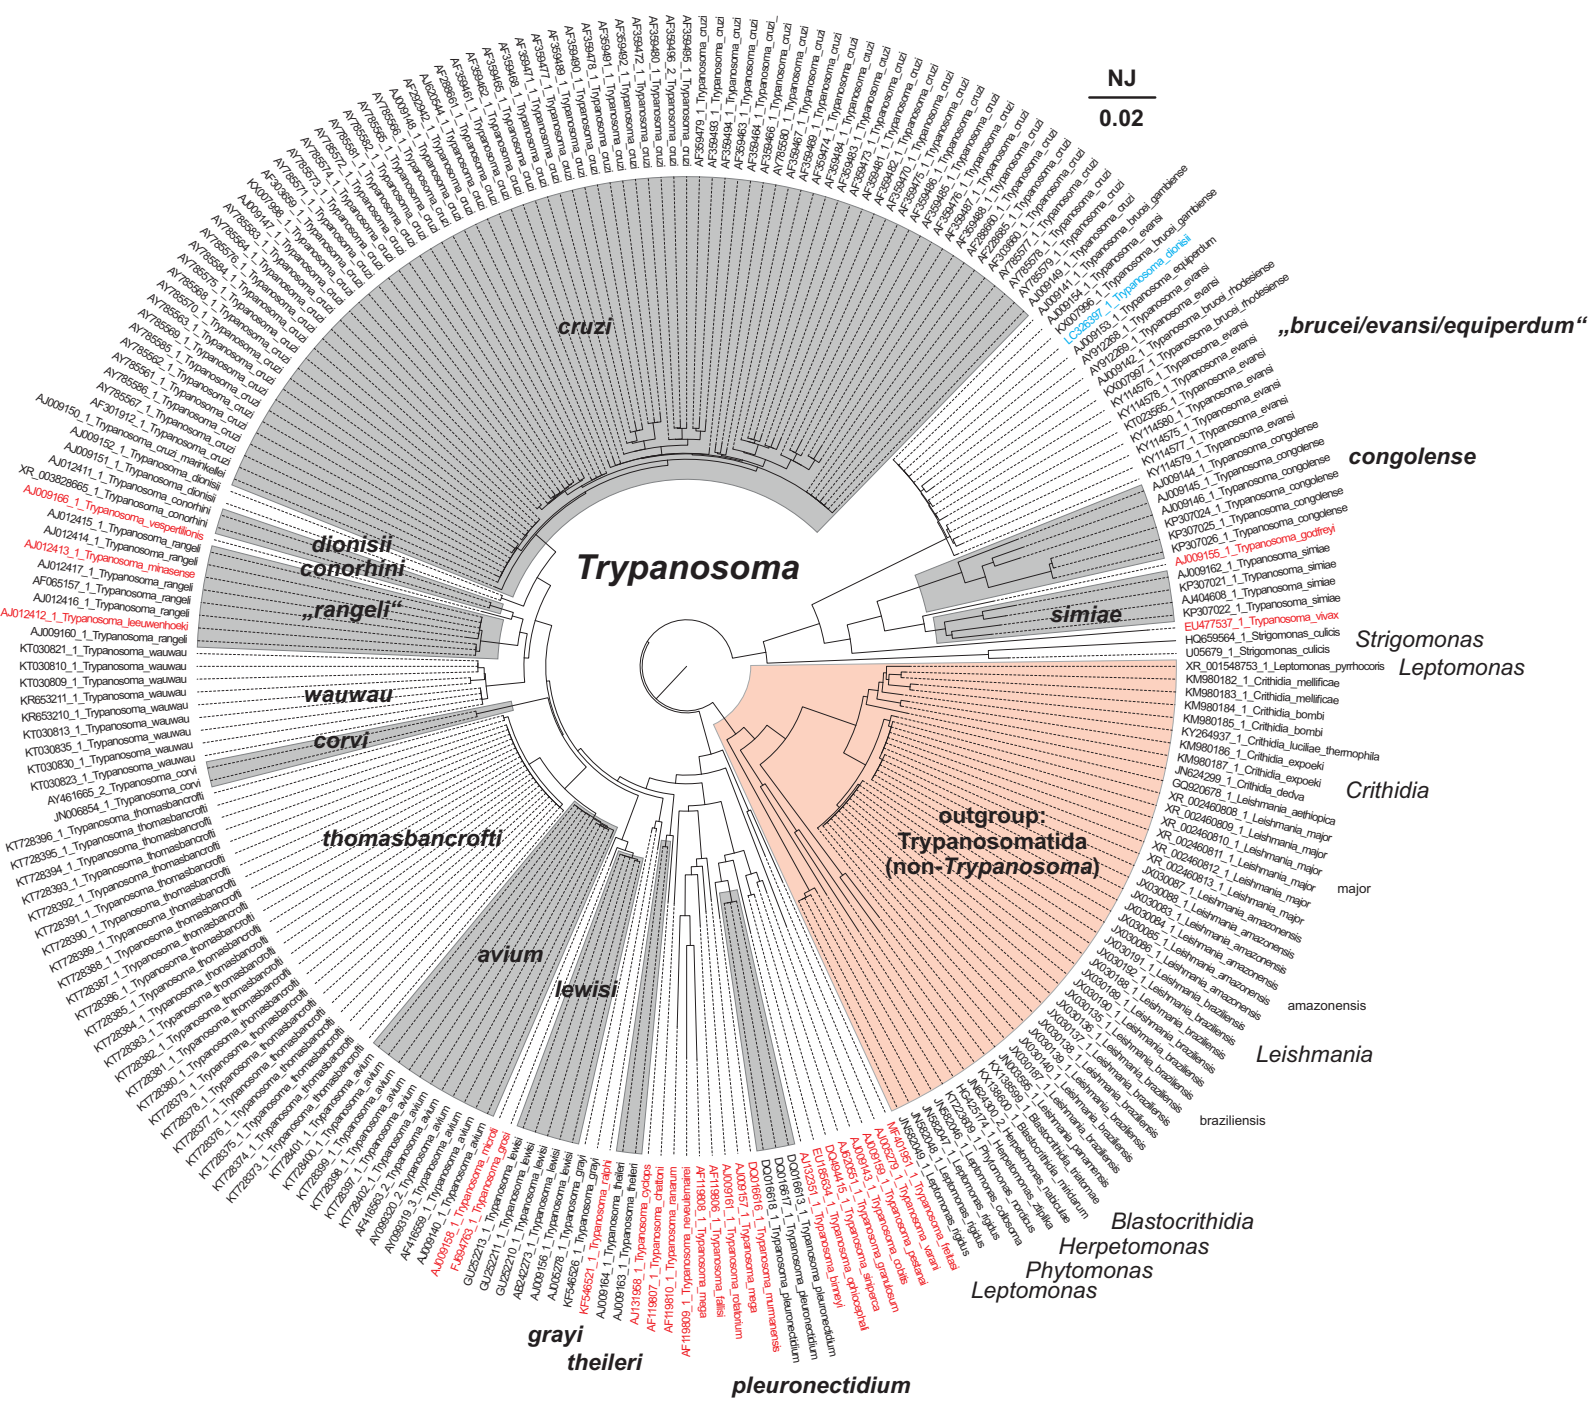

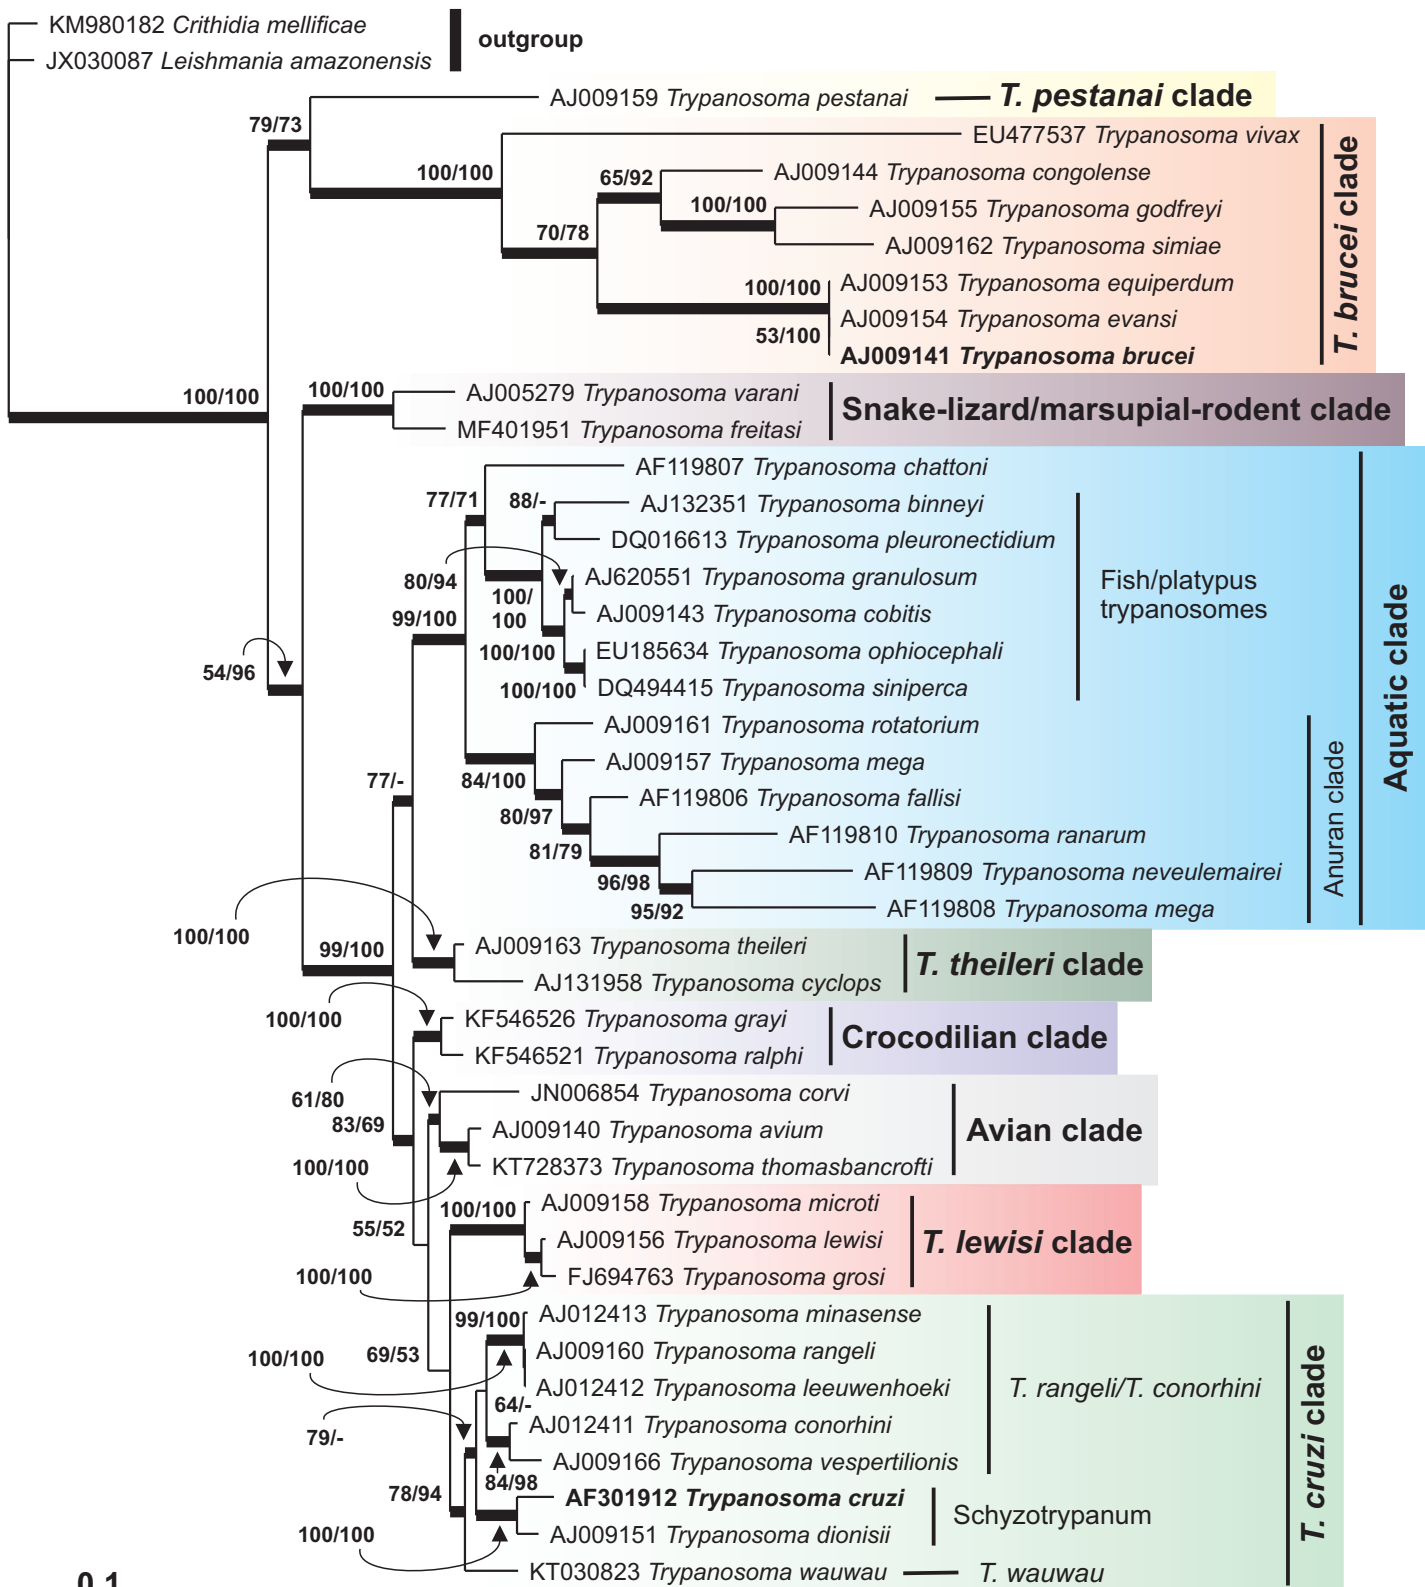

# Secondary Structure: small subunit ribosomal RNA

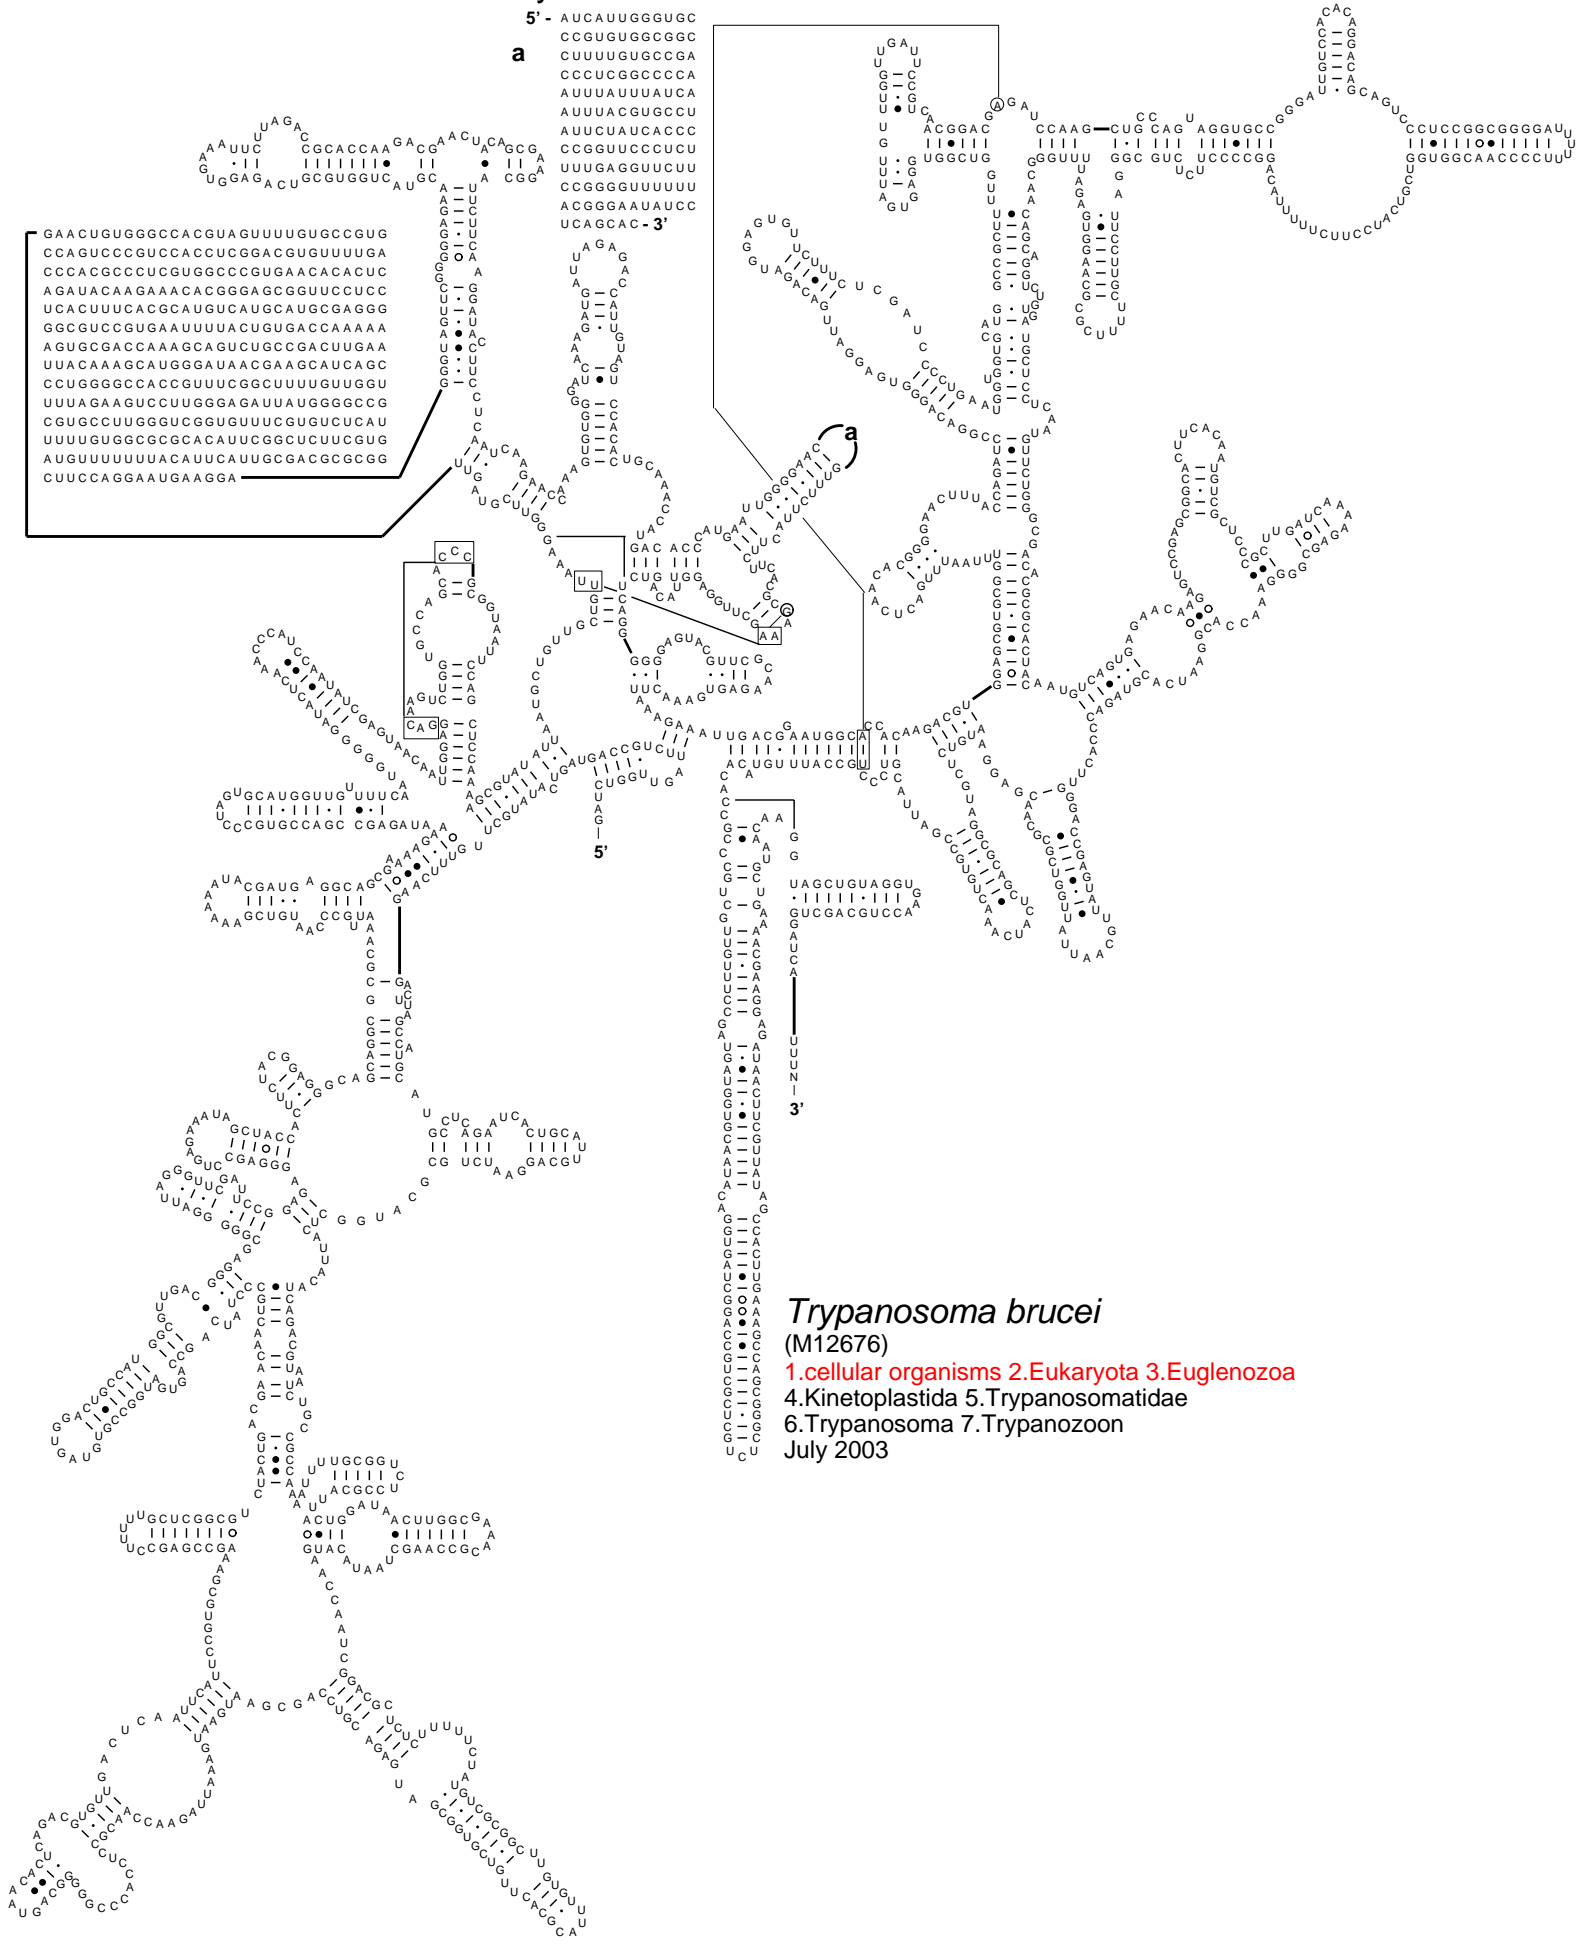

Source: http://biorxiv.org/content/10.1101/2020.08.04.235945v1.full.pdf
